# Supplementary material for: Proteomic Analysis of Gossypol Induces Necrosis in Multiple Myeloma Cells
Source: Hindawi journal article supplement (doi:10.1155/2014/839232), 2014-01-01
Supplement: f1 [file 839232.f1.zip]

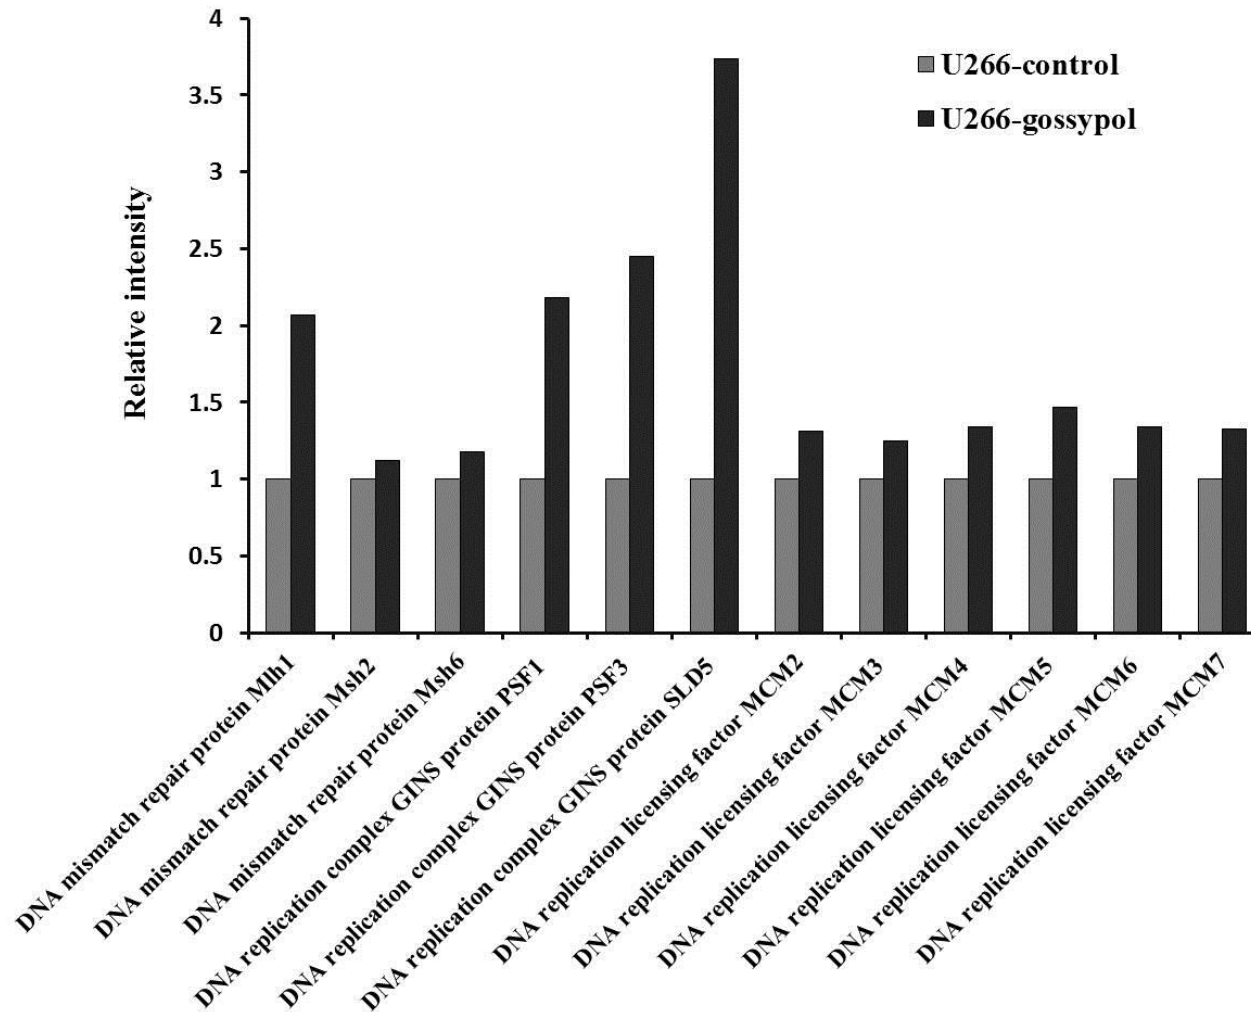

Supplementary Figures 1. Gossypol induced the fold of changes in DNA damage repair and replication associated proteins from the untreated and 40  $\mu\text{mol/L}$  gossypol-treated U266 cells for 24 h as determined by quantitative proteomics.

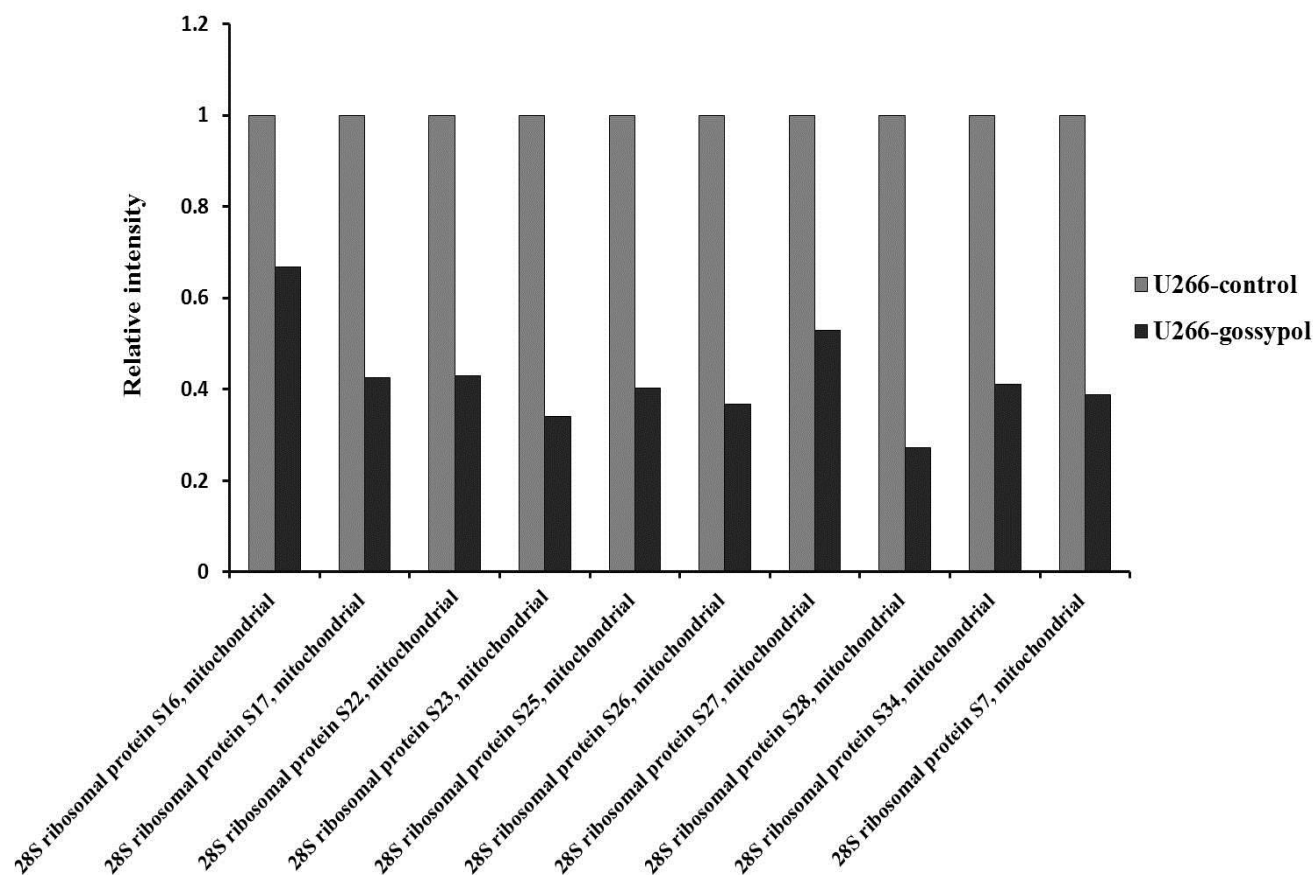

Supplementary Figure 2. Gossypol induced the fold of changes in mitochondrial 28S associated proteins from the untreated and 40  $\mu\text{mol/L}$  gossypol-treated U266 cells for 24 h as determined by quantitative proteomics

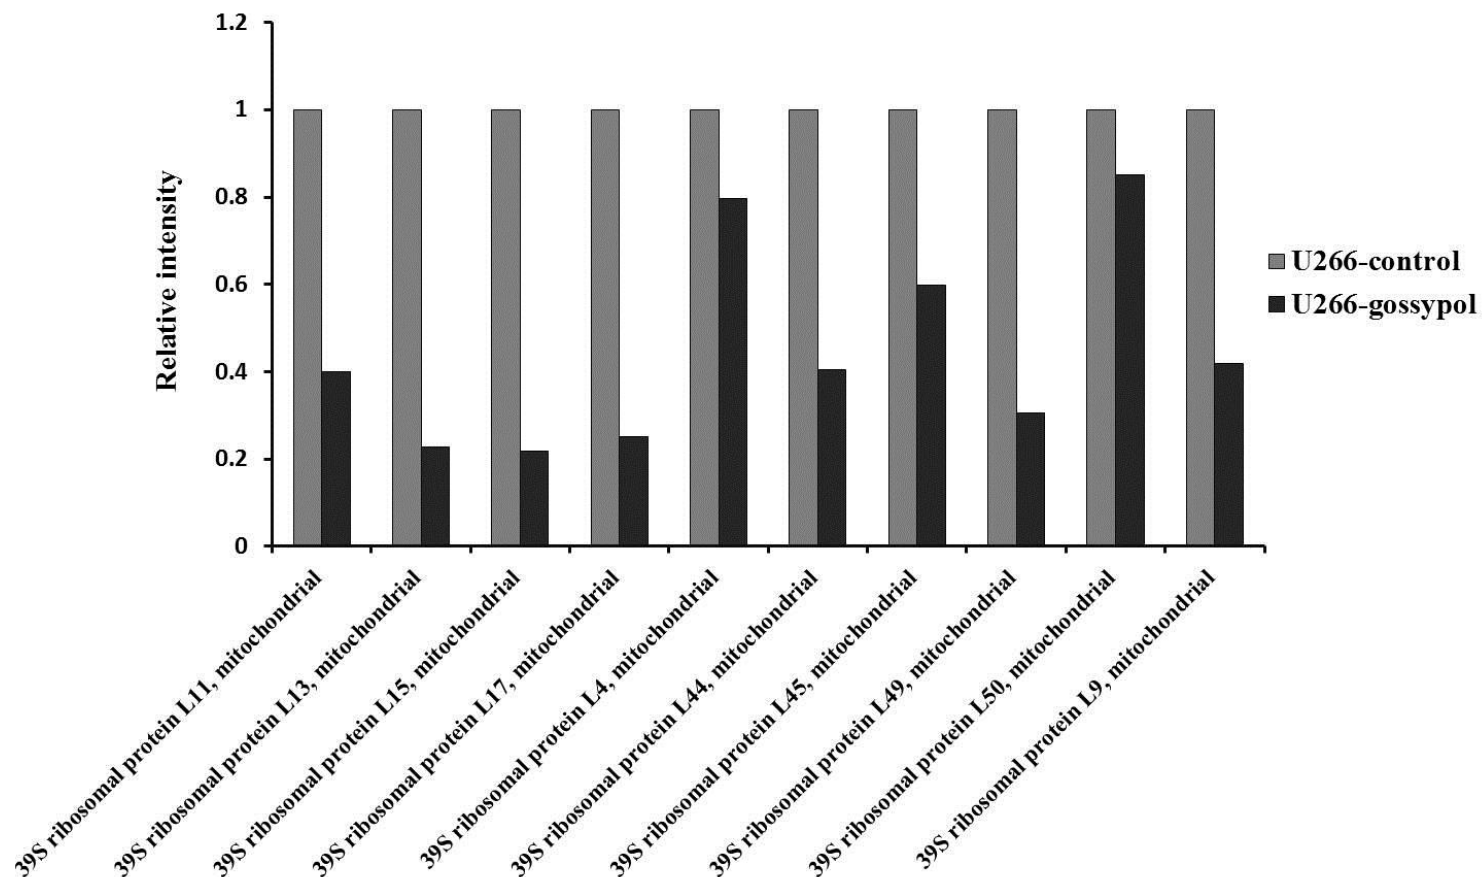

Supplementary Figures 3. Gossypol induced the fold of changes in mitochondrial 39S associated proteins from the untreated and 40  $\mu\text{mol/L}$  gossypol-treated U266 cells for 24 h as determined by quantitative proteomics.
