# Supplementary material for: Proteomic Analysis of Gossypol Induces Necrosis in Multiple Myeloma Cells
Source: Hindawi journal article supplement (doi:10.1155/2014/839232), 2014-01-01
Supplement: f1 [file 839232.f1.zip]

Supplementary Table 1. Up-regulated proteins in gossypol-treated cells

| Accession | Description                                                 | Score | Coverage | Unique Peptides | Gossypol / Control |
|-----------|-------------------------------------------------------------|-------|----------|-----------------|--------------------|
| Q04446    | 1,4-alpha-glucan-branching enzyme                           | 50    | 15       | 10              | 1.8                |
| Q8N543    | 2-oxoglutarate and iron-dependent oxygenase protein 1       | 37    | 17       | 8               | 1.9                |
| H7C131    | 3-ketoacyl-CoA thiolase, peroxisomal                        | 21    | 28       | 6               | 1.7                |
| Q5TFE4    | 5'-nucleotidase domain-containing protein 1                 | 40    | 36       | 9               | 2.2                |
| P10809    | 60 kDa heat shock protein, mitochondrial                    | 430   | 60       | 25              | 1.9                |
| P53999    | Activated RNA polymerase II transcriptional coactivator p15 | 38    | 39       | 7               | 5.2                |
| P27144    | Adenylate kinase 4, mitochondrial                           | 49    | 61       | 10              | 2.1                |
| E9PQP3    | ADP-ribosylation factor GTPase-activating protein 2         | 10    | 15       | 2               | 1.8                |
| P35611-2  | Alpha-adducin                                               | 20    | 10       | 4               | 1.8                |
| Q9Y679-2  | Ancient ubiquitous protein 1                                | 19    | 15       | 5               | 3.4                |
| F5H648    | Antigen peptide transporter 1                               | 11    | 11       | 3               | 2.3                |
| Q8IUR7-3  | Armadillo repeat-containing protein 8                       | 30    | 12       | 4               | 1.8                |
| Q8IYB8    | ATP-dependent RNA helicase SUPV3L1, mitochondrial           | 20    | 8        | 5               | 1.9                |
| Q99856    | AT-rich interactive domain-containing protein 3A            | 14    | 13       | 3               | 7.6                |
| Q96BJ3    | Axininteractor, dorsalization-associated protein            | 13    | 18       | 3               | 1.6                |
| Q16611    | Bcl-2 homologous antagonist/killer                          | 9     | 11       | 2               | 2.0                |
| P61769    | Beta-2-microglobulin                                        | 33    | 49       | 6               | 2.6                |
| Q562R1    | Beta-actin-like protein 2                                   | 193   | 19       | 1               | 3.8                |
| P25098    | Beta-adrenergic receptor kinase 1                           | 39    | 16       | 8               | 1.9                |
| B7Z9G5    | BRO1 domain-containing protein BROX                         | 20    | 15       | 3               | 2.2                |
| O60885    | Bromodomain-containing protein 4                            | 32    | 6        | 4               | 1.7                |
| Q99653    | Calcineurin B homologous protein 1                          | 27    | 46       | 7               | 1.6                |
| P09326    | CD48 antigen                                                | 9     | 13       | 3               | 1.7                |
| P60953-1  | Cell division control protein 42 homolog                    | 165   | 50       | 1               | 2.6                |
| Q9BYV8    | Centrosomal protein of 41 kDa                               | 11    | 12       | 3               | 2.0                |
| Q8WVB6    | Chromosome transmission fidelity protein 18 homolog         | 12    | 6        | 4               | 1.7                |
| Q10570    | Cleavage and polyadenylation specificity factor subunit 1   | 11    | 3        | 3               | 2.2                |
| Q9H0L4    | Cleavage stimulation factor subunit 2 tau variant           | 12    | 11       | 3               | 1.7                |
| Q12996    | Cleavage stimulation factor subunit 3                       | 25    | 12       | 6               | 1.7                |
| Q99417    | C-Myc-binding protein                                       | 13    | 65       | 5               | 1.8                |
| P12259    | Coagulation factor V                                        | 60    | 6        | 14              | 8.0                |
| B8ZZ99    | Coiled-coil domain-containing protein 115                   | 13    | 15       | 2               | 1.9                |
| Q9H6E4    | Coiled-coil domain-containing protein 134                   | 16    | 22       | 4               | 2.2                |
| Q8N668    | COMM domain-containing protein 1                            | 16    | 26       | 3               | 1.6                |
| Q9UBI1    | COMM domain-containing protein 3                            | 39    | 36       | 2               | 1.8                |
| P42695    | Condensin-2 complex subunit D3                              | 24    | 7        | 7               | 2.2                |
| Q9BZJ0-2  | Crooked neck-like protein 1                                 | 20    | 10       | 6               | 2.1                |

|          |                                                            |      |    |    |      |
|----------|------------------------------------------------------------|------|----|----|------|
| O75909   | Cyclin-K                                                   | 9    | 9  | 3  | 2.1  |
| Q15438-2 | Cytohesin-1                                                | 27   | 15 | 5  | 1.9  |
| E9PCG9   | D-beta-hydroxybutyrate dehydrogenase, mitochondrial        | 12   | 17 | 3  | 1.8  |
| G3V3G9   | DDB1- and CUL4-associated factor 8                         | 10   | 3  | 1  | 2.0  |
| Q96BY6-3 | Dedicator of cytokinesis protein 10                        | 14   | 3  | 4  | 1.8  |
| P54886-2 | Delta-1-pyrroline-5-carboxylate synthase                   | 224  | 52 | 32 | 1.6  |
| P32321   | Deoxycytidylatedeaminase                                   | 17   | 21 | 3  | 2.4  |
| Q9BU89   | Deoxyhypusine hydroxylase                                  | 21   | 26 | 4  | 3.1  |
| P49366   | Deoxyhypusine synthase                                     | 30   | 23 | 5  | 1.9  |
| P33316   | Deoxyuridine 5'-triphosphate nucleotidohydrolase           | 150  | 54 | 11 | 1.8  |
| P00374   | Dihydrofolatereductase                                     | 27   | 43 | 8  | 1.9  |
| P26358   | DNA (cytosine-5)-methyltransferase 1                       | 92   | 16 | 22 | 2.0  |
| B4DTU4   | DNA ligase                                                 | 77   | 26 | 18 | 2.9  |
| H0Y818   | DNA mismatch repair protein Mlh1                           | 21   | 12 | 5  | 2.1  |
| Q14691   | DNA replication complex GINS protein PSF1                  | 16   | 30 | 4  | 2.2  |
| Q9BRX5   | DNA replication complex GINS protein PSF3                  | 25   | 35 | 6  | 2.5  |
| E5RFF9   | DNA replication complex GINS protein SLD5                  | 13   | 17 | 2  | 3.7  |
| P31689   | DnaJ homolog subfamily A member 1                          | 115  | 51 | 15 | 1.7  |
| Q13217   | DnaJ homolog subfamily C member 3                          | 14   | 8  | 3  | 1.7  |
| Q5VTR2   | E3 ubiquitin-protein ligase BRE1A                          | 31   | 9  | 6  | 1.7  |
| O75150-4 | E3 ubiquitin-protein ligase BRE1B                          | 43   | 15 | 10 | 1.7  |
| Q7Z6E9-2 | E3 ubiquitin-protein ligase RBBP6                          | 21   | 3  | 5  | 1.7  |
| Q14669-4 | E3 ubiquitin-protein ligase TRIP12                         | 22   | 6  | 7  | 1.8  |
| Q9NZN3   | EH domain-containing protein 3                             | 42   | 17 | 1  | 1.8  |
| Q9H223   | EH domain-containing protein 4                             | 23   | 13 | 4  | 1.8  |
| P29692-4 | Elongation factor 1-delta                                  | 170  | 50 | 1  | 2.0  |
| B4DKB2   | Endothelin-converting enzyme 1                             | 14   | 7  | 3  | 2.6  |
| O60344-4 | Endothelin-converting enzyme 2                             | 15   | 21 | 3  | 1.7  |
| Q8N766-2 | ER membrane protein complex subunit 1                      | 9    | 4  | 3  | 3.8  |
| Q9HAV4   | Exportin-5                                                 | 67   | 12 | 11 | 2.4  |
| P11166   | Facilitated glucose transporter member 1                   | 18   | 4  | 3  | 1.7  |
| Q9NVI1   | Fanconi anemia group I protein                             | 87   | 22 | 21 | 1.9  |
| P09972   | Fructose-bisphosphatealdolase C                            | 180  | 55 | 8  | 2.7  |
| Q96GK7   | Fumarylacetoacetate hydrolase domain-containing protein 2A | 11   | 18 | 3  | 2.1  |
| P13284   | Gamma-interferon-inducible lysosomalthiolreductase         | 17   | 23 | 3  | 3.1  |
| Q03013-2 | Glutathione S-transferase Mu 4                             | 31   | 51 | 6  | 1.9  |
| Q08379   | Golgin subfamily A member 2                                | 35   | 10 | 7  | 1.6  |
| H0YK03   | Golgin subfamily A member 5                                | 9    | 21 | 2  | 1.6  |
| Q12849   | G-rich sequence factor 1                                   | 24   | 20 | 5  | 10.5 |
| O00178   | GTP-binding protein 1                                      | 11   | 12 | 4  | 2.0  |
| Q9HAV0   | Guanine nucleotide-binding protein subunit beta-4          | 30   | 27 | 2  | 3.7  |
| P08238   | Heat shock protein HSP 90-beta                             | 3035 | 73 | 37 | 1.6  |

|          |                                                           |     |    |    |     |
|----------|-----------------------------------------------------------|-----|----|----|-----|
| P54652   | Heat shock-related 70 kDa protein 2                       | 444 | 23 | 2  | 3.8 |
| Q14527-2 | Helicase-like transcription factor                        | 13  | 5  | 3  | 2.6 |
| J3KT51   | Hematological and neurological-expressed 1 protein        | 30  | 56 | 5  | 1.7 |
| G3V2Q1   | Heterogeneous nuclear ribonucleoproteins C1/C2            | 248 | 51 | 1  | 3.8 |
| E9PB90   | Hexokinase-2                                              | 128 | 28 | 17 | 2.6 |
| P01891   | HLA class I histocompatibility antigen, A-68 alpha chain  | 133 | 39 | 2  | 2.3 |
| Q5SRN7   | HLA class I histocompatibility antigen, A-68 alpha chain  | 163 | 58 | 7  | 1.7 |
| P30487   | HLA class I histocompatibility antigen, B-49 alpha chain  | 196 | 47 | 3  | 2.3 |
| P04233-2 | HLA class II histocompatibility antigen gamma chain       | 50  | 31 | 7  | 4.4 |
| H0Y6F8   | HLA class II histocompatibility antigen, DP alpha 1 chain | 37  | 23 | 2  | 2.0 |
| A2AAZ0   | HLA class II histocompatibility antigen, DQ beta 1 chain  | 19  | 29 | 6  | 4.0 |
| Q30154   | HLA class II histocompatibility antigen, DR beta 5 chain  | 138 | 39 | 2  | 1.7 |
| P39880-4 | Homeobox protein cut-like 1                               | 53  | 14 | 5  | 1.8 |
| P52292   | Importin subunit alpha-1                                  | 30  | 19 | 6  | 1.9 |
| Q9UI26   | Importin-11                                               | 43  | 13 | 8  | 2.7 |
| Q6P9B9   | Integrator complex subunit 5                              | 12  | 5  | 3  | 1.9 |
| Q8IU81   | Interferon regulatory factor 2-binding protein 1          | 10  | 8  | 3  | 1.7 |
| E7EPJ2   | Intersectin-2                                             | 14  | 9  | 4  | 1.9 |
| P55196-2 | Isoform 1 of Afadin                                       | 10  | 2  | 2  | 2.2 |
| Q86UK7-2 | Isoform 2 of Zinc finger protein 598                      | 9   | 5  | 3  | 1.8 |
| P29728-2 | Isoform p69 of 2'-5'-oligoadenylate synthase 2            | 21  | 12 | 7  | 2.3 |
| Q9H0B6   | Kinesin light chain 2                                     | 25  | 13 | 2  | 1.8 |
| P52732   | Kinesin-like protein KIF11                                | 68  | 22 | 15 | 1.7 |
| B7Z6Q6   | Kinesin-like protein KIF2C                                | 14  | 7  | 4  | 2.8 |
| Q9BW19   | Kinesin-like protein KIFC1                                | 26  | 13 | 6  | 1.6 |
| Q8NBT2   | Kinetochore protein Spc24                                 | 40  | 49 | 5  | 1.6 |
| Q9HBM1   | Kinetochore protein Spc25                                 | 20  | 28 | 4  | 2.0 |
| P48449-2 | Lanosterol synthase                                       | 10  | 7  | 5  | 1.7 |
| O95232   | Luc7-like protein 3                                       | 47  | 23 | 7  | 1.9 |
| Q9Y4C1   | Lysine-specific demethylase 3A                            | 24  | 8  | 7  | 3.3 |
| Q7LBC6   | Lysine-specific demethylase 3B                            | 35  | 10 | 10 | 2.0 |
| Q13571   | Lysosomal-associated transmembrane protein 5              | 9   | 9  | 2  | 2.9 |
| G3V267   | Maleylacetoacetateisomerase                               | 29  | 34 | 4  | 1.7 |
| Q96IJ6   | Mannose-1-phosphate guanyltransferase alpha               | 11  | 8  | 3  | 3.3 |
| Q9H204   | Mediator of RNA polymerase II transcription subunit 28    | 9   | 20 | 2  | 2.5 |
| G3XA91   | Methionine aminopeptidase 2                               | 123 | 57 | 2  | 2.1 |
| H3BTL1   | Microtubule-associated protein 1 light chain 3 beta       | 10  | 37 | 3  | 2.7 |
| Q9BTE3-3 | Mini-chromosome maintenance complex-binding protein       | 17  | 12 | 4  | 4.1 |
| Q9Y3D6   | Mitochondrial fission 1 protein                           | 21  | 24 | 4  | 1.9 |
| O43148   | mRNA cap guanine-N7 methyltransferase                     | 20  | 19 | 7  | 1.6 |
| O95671-3 | N-acetylserotonin O-methyltransferase-like protein        | 14  | 11 | 3  | 2.7 |
| Q9UBB6-2 | Neurochondrin                                             | 29  | 13 | 7  | 1.8 |

|           |                                                         |     |    |    |     |
|-----------|---------------------------------------------------------|-----|----|----|-----|
| M0R3B2    | Nitric oxide synthase-interacting protein               | 29  | 38 | 6  | 1.7 |
| O00746    | Nucleoside diphosphate kinase, mitochondrial            | 10  | 19 | 3  | 2.2 |
| O00151    | PDZ and LIM domain protein 1                            | 52  | 40 | 8  | 3.0 |
| Q9H2J4    | Phosducin-like protein 3                                | 18  | 21 | 5  | 1.9 |
| Q8NC51    | Plasminogen activator inhibitor 1 RNA-binding protein   | 114 | 45 | 2  | 1.7 |
| Q8NC51-3  | Plasminogen activator inhibitor 1 RNA-binding protein   | 137 | 53 | 4  | 2.1 |
| Q9NX46    | Poly(ADP-ribose) glycohydrolase ARH3                    | 10  | 15 | 3  | 2.4 |
| Q15366-6  | Poly(rC)-binding protein 2                              | 199 | 55 | 1  | 1.9 |
| Q6UN15-5  | Pre-mRNA 3'-end-processing factor FIP1                  | 54  | 24 | 8  | 1.7 |
| Q8NAV1    | Pre-mRNA-splicing factor 38A                            | 16  | 26 | 6  | 1.7 |
| Q2NL82    | Pre-rRNA-processing protein TSR1 homolog                | 27  | 14 | 8  | 1.6 |
| J3KTA4    | Probable ATP-dependent RNA helicase DDX5                | 178 | 42 | 19 | 1.6 |
| P07602    | Prosaposin                                              | 59  | 21 | 10 | 1.6 |
| J3QQN1    | Proteasome subunit beta type-10                         | 15  | 22 | 2  | 2.1 |
| Q13948-10 | Protein CASP                                            | 33  | 19 | 1  | 1.8 |
| Q8TCG1-2  | Protein CIP2A                                           | 11  | 4  | 2  | 2.0 |
| Q9NSV4-1  | Protein diaphanous homolog 3                            | 14  | 5  | 4  | 2.2 |
| F8W7Q4    | Protein FAM162A                                         | 14  | 19 | 4  | 1.6 |
| H3BUL4    | Protein FAM192A                                         | 10  | 14 | 2  | 1.7 |
| Q96GA3    | Protein LTV1 homolog                                    | 19  | 11 | 4  | 2.0 |
| Q9BPW8    | Protein NipSnap homolog 1                               | 51  | 37 | 8  | 2.0 |
| P48634-2  | Protein PRRC2A                                          | 27  | 7  | 9  | 2.0 |
| Q9Y520-3  | Protein PRRC2C                                          | 91  | 13 | 23 | 2.0 |
| Q14160-2  | Protein scribble homolog                                | 11  | 3  | 3  | 1.9 |
| Q01105    | Protein SET                                             | 182 | 43 | 2  | 1.7 |
| P18583-6  | Protein SON                                             | 37  | 6  | 9  | 1.9 |
| Q9UNS1-2  | Protein timeless homolog                                | 10  | 3  | 3  | 1.7 |
| J3KNL6    | Protein transport protein Sec16A                        | 58  | 10 | 14 | 1.9 |
| O95486    | Protein transport protein Sec24A                        | 23  | 7  | 6  | 1.8 |
| O94855    | Protein transport protein Sec24D                        | 21  | 12 | 7  | 1.7 |
| P61619    | Protein transport protein Sec61 subunit alpha isoform 1 | 18  | 13 | 4  | 1.8 |
| Q5T1J5    | Putative protein CHCHD2P9                               | 17  | 27 | 2  | 7.0 |
| O60518    | Ran-binding protein 6                                   | 36  | 6  | 1  | 2.0 |
| P15153    | Ras-related C3 botulinum toxin substrate 2              | 78  | 41 | 4  | 1.7 |
| B7Z9I3    | Renin receptor                                          | 33  | 29 | 6  | 2.6 |
| Q86TG7    | Retrotransposon-derived protein PEG10                   | 10  | 7  | 3  | 2.2 |
| Q68EM7-2  | Rho GTPase-activating protein 17                        | 17  | 9  | 4  | 2.0 |
| Q15052-2  | Rho guanine nucleotide exchange factor 6                | 13  | 8  | 2  | 1.7 |
| H0YEF3    | Ribonuclease H2 subunit C                               | 19  | 27 | 4  | 1.8 |
| P23921    | Ribonucleoside-diphosphatereductase large subunit       | 129 | 38 | 22 | 3.5 |
| O43709    | Ribosome biogenesis methyltransferase WBSCR22           | 12  | 11 | 2  | 1.8 |
| Q9P2E9-3  | Ribosome-binding protein 1                              | 58  | 25 | 16 | 2.0 |
| Q9Y508-2  | RING finger protein 114                                 | 13  | 30 | 5  | 1.6 |

|          |                                                               |     |    |    |      |
|----------|---------------------------------------------------------------|-----|----|----|------|
| Q6PD62   | RNA polymerase-associated protein CTR9 homolog                | 51  | 16 | 15 | 1.8  |
| Q9P2N5   | RNA-binding protein 27                                        | 29  | 11 | 6  | 2.4  |
| Q9ULX3   | RNA-binding protein NOB1                                      | 14  | 19 | 4  | 2.6  |
| E9PJB8   | Selenoprotein S                                               | 19  | 23 | 5  | 1.7  |
| E7EMC7   | Sequestosome-1                                                | 21  | 20 | 4  | 19.5 |
| Q9UQ35   | Serine/arginine repetitive matrix protein 2                   | 74  | 11 | 19 | 1.9  |
| Q5T760   | Serine/arginine-rich-splicing factor 11                       | 41  | 19 | 5  | 1.7  |
| F5H2U2   | Serine/threonine-protein kinase PRP4 homolog                  | 12  | 5  | 4  | 1.7  |
| Q13362-2 | Serine/threonine-protein phosphatase 2A 56 kDa regulatory     | 33  | 23 | 2  | 2.3  |
| Q6IN85-2 | Serine/threonine-protein phosphatase 4 regulatory subunit 3A  | 33  | 12 | 8  | 2.4  |
| P42224   | Signal transducer and activator of transcription 1-alpha/beta | 50  | 19 | 10 | 2.5  |
| A9IYQ1   | Sister chromatid cohesion protein PDS5 homolog B              | 38  | 27 | 1  | 2.9  |
| Q01082   | Spectrin beta chain, non-erythrocytic 1                       | 489 | 39 | 6  | 1.9  |
| B3KQ95   | Squalene synthase                                             | 14  | 20 | 5  | 18.6 |
| Q92922   | SWI/SNF complex subunit SMARCC1                               | 69  | 18 | 8  | 1.7  |
| O43752   | Syntaxin-6                                                    | 15  | 16 | 2  | 1.7  |
| O00560-2 | Syntenin-1                                                    | 13  | 24 | 3  | 1.9  |
| Q86VP1-2 | Tax1-binding protein 1                                        | 9   | 5  | 4  | 1.9  |
| Q5UIP0-2 | Telomere-associated protein RIF1                              | 66  | 11 | 17 | 2.6  |
| P04183   | Thymidine kinase, cytosolic                                   | 20  | 20 | 4  | 3.9  |
| P04818-2 | Thymidylate synthase                                          | 47  | 35 | 8  | 3.6  |
| C9JER1   | Thyroid adenoma-associated protein                            | 13  | 5  | 4  | 2.0  |
| P20290   | Transcription factor BTF3                                     | 129 | 61 | 1  | 4.1  |
| Q00403   | Transcription initiation factor IIB                           | 11  | 12 | 3  | 1.6  |
| P29084   | Transcription initiation factor IIE subunit beta              | 14  | 24 | 5  | 1.8  |
| Q8WXI9   | Transcriptional repressor p66-beta                            | 39  | 18 | 6  | 1.9  |
| P02786   | Transferrin receptor protein 1                                | 280 | 39 | 26 | 1.7  |
| K7EQG9   | Tyrosine-protein phosphatase non-receptor type                | 13  | 13 | 3  | 2.9  |
| P29350   | Tyrosine-protein phosphatase non-receptor type 6              | 47  | 26 | 10 | 4.0  |
| O14933   | Ubiquitin/ISG15-conjugating enzyme E2 L6                      | 30  | 44 | 4  | 1.6  |
| C9J2P0   | Ubiquitin-conjugating enzyme E2 E1                            | 12  | 18 | 1  | 1.8  |
| P62253   | Ubiquitin-conjugating enzyme E2 G1                            | 12  | 33 | 3  | 2.4  |
| Q92575   | UBX domain-containing protein 4                               | 15  | 19 | 5  | 1.9  |
| Q9BZX2   | Uridine-cytidine kinase 2                                     | 25  | 30 | 5  | 1.6  |
| P06132   | Uroporphyrinogen decarboxylase                                | 20  | 15 | 3  | 2.1  |
| Q9Y2W2   | WW domain-binding protein 11                                  | 49  | 13 | 9  | 1.7  |
| M0QY97   | Zinc finger CCCH domain-containing protein 4                  | 26  | 14 | 7  | 2.7  |
| B4DT58   | Zinc finger protein ubi-d4                                    | 9   | 15 | 2  | 2.0  |
