# Supplementary material for: Proteomic Analysis of Gossypol Induces Necrosis in Multiple Myeloma Cells
Source: Hindawi journal article supplement (doi:10.1155/2014/839232), 2014-01-01
Supplement: f1 [file 839232.f1.zip]

Supplementary Table 2. Down-regulated proteins in gossypol-treated cells

| Accession | Description                                                | Score | Coverage | Unique Peptides | Gossypol / Control |
|-----------|------------------------------------------------------------|-------|----------|-----------------|--------------------|
| P16885    | 1-phosphatidylinositol 4,5-bisphosphate phosphodiesterase  | 135   | 26       | 26              | 0.7                |
| P82912-2  | 28S ribosomal protein S11, mitochondrial                   | 13    | 24       | 3               | 0.1                |
| A6ND22    | 28S ribosomal protein S16, mitochondrial                   | 19    | 26       | 2               | 0.7                |
| E9PE17    | 28S ribosomal protein S17, mitochondrial                   | 21    | 45       | 3               | 0.4                |
| G5E9W7    | 28S ribosomal protein S22, mitochondrial                   | 37    | 40       | 9               | 0.4                |
| Q9Y3D9    | 28S ribosomal protein S23, mitochondrial                   | 16    | 35       | 6               | 0.3                |
| Q96EL2    | 28S ribosomal protein S24, mitochondrial                   | 11    | 22       | 3               | 0.4                |
| P82663    | 28S ribosomal protein S25, mitochondrial                   | 12    | 23       | 4               | 0.4                |
| Q9BYN8    | 28S ribosomal protein S26, mitochondrial                   | 14    | 19       | 4               | 0.4                |
| G5EA06    | 28S ribosomal protein S27, mitochondrial                   | 17    | 21       | 5               | 0.5                |
| Q9Y2Q9    | 28S ribosomal protein S28, mitochondrial                   | 24    | 35       | 5               | 0.3                |
| P51398-2  | 28S ribosomal protein S29, mitochondrial                   | 26    | 20       | 5               | 0.4                |
| P82930    | 28S ribosomal protein S34, mitochondrial                   | 35    | 47       | 8               | 0.4                |
| Q9Y2R9    | 28S ribosomal protein S7, mitochondrial                    | 15    | 20       | 5               | 0.4                |
| F8VVX6    | 2-methoxy-6-polyprenyl-1,4-benzoquinol methylase           | 12    | 19       | 3               | 0.7                |
| F5H801    | 2-oxoglutarate dehydrogenase, mitochondrial                | 14    | 7        | 6               | 0.4                |
| P21953    | 2-oxoisovalerate dehydrogenase subunit beta, mitochondrial | 13    | 10       | 3               | 0.5                |
| O95861    | 3'(2'),5'-bisphosphate nucleotidase 1                      | 110   | 69       | 17              | 0.5                |
| Q7Z7H8    | 39S ribosomal protein L10, mitochondrial                   | 10    | 10       | 2               | 0.4                |
| Q9Y3B7    | 39S ribosomal protein L11, mitochondrial                   | 30    | 41       | 7               | 0.4                |
| Q9BYD1    | 39S ribosomal protein L13, mitochondrial                   | 24    | 49       | 8               | 0.2                |
| Q9P015    | 39S ribosomal protein L15, mitochondrial                   | 21    | 27       | 7               | 0.2                |
| Q9NX20    | 39S ribosomal protein L16, mitochondrial                   | 14    | 14       | 3               | 0.1                |
| E9PKV2    | 39S ribosomal protein L17, mitochondrial                   | 16    | 18       | 3               | 0.3                |
| Q9H0U6    | 39S ribosomal protein L18, mitochondrial                   | 9     | 18       | 3               | 0.3                |
| S4R3W9    | 39S ribosomal protein L19, mitochondrial                   | 10    | 21       | 3               | 0.3                |
| I3L2X1    | 39S ribosomal protein L20, mitochondrial                   | 9     | 32       | 2               | 0.5                |
| Q16540    | 39S ribosomal protein L23, mitochondrial                   | 12    | 34       | 4               | 0.2                |
| Q13084    | 39S ribosomal protein L28, mitochondrial                   | 14    | 29       | 4               | 0.3                |
| P09001    | 39S ribosomal protein L3, mitochondrial                    | 10    | 12       | 3               | 0.3                |
| Q96DV4    | 39S ribosomal protein L38, mitochondrial                   | 12    | 7        | 3               | 0.3                |
| Q9H9J2    | 39S ribosomal protein L44, mitochondrial                   | 17    | 23       | 5               | 0.4                |
| Q9BRJ2    | 39S ribosomal protein L45, mitochondrial                   | 21    | 17       | 5               | 0.6                |
| Q9H2W6    | 39S ribosomal protein L46, mitochondrial                   | 14    | 22       | 5               | 0.5                |
| Q9HD33-2  | 39S ribosomal protein L47, mitochondrial                   | 9     | 17       | 4               | 0.4                |
| F5H702    | 39S ribosomal protein L48, mitochondrial                   | 12    | 21       | 2               | 0.3                |
| Q13405    | 39S ribosomal protein L49, mitochondrial                   | 19    | 30       | 4               | 0.3                |
| Q96EL3    | 39S ribosomal protein L53, mitochondrial                   | 10    | 43       | 4               | 0.4                |
| Q9BYD2    | 39S ribosomal protein L9, mitochondrial                    | 29    | 33       | 8               | 0.4                |

|          |                                                                |     |    |    |     |
|----------|----------------------------------------------------------------|-----|----|----|-----|
| Q9P035   | 3-hydroxyacyl-[acyl-carrier protein] dehydratase 3             | 20  | 15 | 4  | 0.7 |
| Q99714   | 3-hydroxyacyl-CoA dehydrogenase type-2                         | 256 | 89 | 17 | 0.7 |
| Q9BUT1   | 3-hydroxybutyrate dehydrogenase type 2                         | 31  | 33 | 7  | 0.5 |
| Q96IR7   | 4-hydroxyphenylpyruvate dioxygenase-like protein               | 64  | 40 | 10 | 0.5 |
| P27635   | 60S ribosomal protein L10                                      | 146 | 50 | 3  | 0.6 |
| Q6DKI1   | 60S ribosomal protein L7-like 1                                | 14  | 26 | 5  | 0.5 |
| Q86V21   | Acetoacetyl-CoA synthetase                                     | 10  | 6  | 4  | 0.6 |
| Q13085-3 | Acetyl-CoA carboxylase 1                                       | 13  | 3  | 5  | 0.6 |
| Q99798   | Aconitate hydratase, mitochondrial                             | 218 | 52 | 30 | 0.6 |
| P07108   | Acyl-CoA-binding protein                                       | 42  | 64 | 5  | 0.6 |
| O95372   | Acyl-protein thioesterase 2                                    | 23  | 18 | 3  | 0.6 |
| P46108   | Adapter molecule crk                                           | 26  | 29 | 1  | 0.4 |
| Q01518   | Adenylyl cyclase-associated protein 1                          | 100 | 47 | 23 | 0.7 |
| P12235   | ADP/ATP translocase 1                                          | 180 | 39 | 2  | 0.2 |
| C9JZR4   | ADP-ribosylation factor GTPase-activating protein 3            | 10  | 12 | 3  | 0.6 |
| Q96BM9   | ADP-ribosylation factor-like protein 8A                        | 71  | 44 | 1  | 0.6 |
| Q9Y4W6   | AFG3-like protein 2                                            | 71  | 27 | 17 | 0.6 |
| Q9ULX6-2 | A-kinase anchor protein 8-like                                 | 10  | 8  | 4  | 0.6 |
| P49588   | Alanine--tRNA ligase, cytoplasmic                              | 419 | 58 | 41 | 0.7 |
| P15121   | Aldose reductase                                               | 166 | 76 | 17 | 0.7 |
| P61163   | Alpha-centractin                                               | 67  | 41 | 9  | 0.7 |
| P40222   | Alpha-taxilin                                                  | 26  | 16 | 7  | 0.7 |
| Q06203   | Amidophosphoribosyltransferase                                 | 33  | 16 | 7  | 0.7 |
| E5RJ99   | AN1-type zinc finger protein 1                                 | 9   | 15 | 3  | 0.6 |
| Q8IWZ3   | Ankyrin repeat and KH domain-containing protein 1              | 29  | 4  | 6  | 0.5 |
| H0YM23   | Ankyrin repeat domain-containing protein 17                    | 34  | 5  | 3  | 0.6 |
| P08758   | Annexin A5                                                     | 226 | 67 | 19 | 0.7 |
| Q9BXS5   | AP-1 complex subunit mu-1                                      | 26  | 21 | 7  | 0.6 |
| Q9ULZ3-3 | Apoptosis-associated speck-like protein containing a CARD      | 26  | 32 | 4  | 0.5 |
| P20292   | Arachidonate 5-lipoxygenase-activating protein                 | 16  | 19 | 4  | 0.6 |
| P53367   | Arfaptin-1                                                     | 34  | 29 | 7  | 0.7 |
| P04424-3 | Argininosuccinatelyase                                         | 14  | 14 | 5  | 0.7 |
| P00966   | Argininosuccinate synthase                                     | 19  | 21 | 7  | 0.3 |
| P00505   | Aspartate aminotransferase, mitochondrial                      | 377 | 63 | 26 | 0.6 |
| Q15121   | Astrocytic phosphoprotein PEA-15                               | 46  | 45 | 6  | 0.5 |
| P11912   | B-cell antigen receptor complex-associated protein alpha chain | 14  | 35 | 4  | 0.5 |
| P13995   | Bifunctional methylenetetrahydrofolate dehydrogenase           | 42  | 32 | 8  | 0.6 |
| P54687-4 | Branched-chain-amino-acid aminotransferase, cytosolic          | 98  | 31 | 12 | 0.7 |
| Q8WY22   | BRI3-binding protein                                           | 22  | 17 | 3  | 0.6 |
| F6U1T9   | Calcineurin subunit B type 1                                   | 28  | 26 | 3  | 0.6 |
| Q9BRF8   | Calcineurin-like phosphoesterase domain-containing protein 1   | 23  | 29 | 6  | 0.7 |

|           |                                                     |     |    |    |     |
|-----------|-----------------------------------------------------|-----|----|----|-----|
| Q13557-12 | Calcium/calmodulin-dependent protein kinase type II | 59  | 27 | 11 | 0.7 |
| Q9H9S4    | Calcium-binding protein 39-like                     | 79  | 44 | 11 | 0.5 |
| E7EQ12    | Calpastatin                                         | 15  | 8  | 2  | 0.6 |
| O43852    | Calumenin                                           | 136 | 47 | 13 | 0.7 |
| Q9BXW7-2  | Cat eye syndrome critical region protein 5          | 14  | 13 | 4  | 0.6 |
| F5GXJ9    | CD166 antigen                                       | 14  | 13 | 4  | 0.5 |
| E9PNW4    | CD59 glycoprotein                                   | 10  | 19 | 2  | 0.1 |
| P32970    | CD70 antigen                                        | 23  | 20 | 3  | 0.5 |
| E9PIK1    | CD81 antigen                                        | 78  | 41 | 4  | 0.5 |
| A6NNI4    | CD9 antigen                                         | 17  | 14 | 2  | 0.4 |
| Q9Y696    | Chloride intracellular channel protein 4            | 127 | 67 | 15 | 0.7 |
| Q13185    | Chromobox protein homolog 3                         | 73  | 59 | 7  | 0.7 |
| P45973    | Chromobox protein homolog 5                         | 45  | 37 | 7  | 0.4 |
| Q7RTS1    | Class A basic helix-loop-helix protein 15           | 30  | 30 | 4  | 0.6 |
| Q14019    | Coactosin-like protein                              | 89  | 68 | 11 | 0.6 |
| Q6P1N0-2  | Coiled-coil and C2 domain-containing protein 1A     | 16  | 4  | 4  | 0.7 |
| Q9H6F5    | Coiled-coil domain-containing protein 86            | 10  | 17 | 4  | 0.6 |
| Q9UP83-3  | Conserved oligomeric Golgi complex subunit 5        | 16  | 8  | 4  | 0.7 |
| O75367-2  | Core histone macro-H2A.1                            | 82  | 48 | 13 | 0.4 |
| E9PKA1    | CUGBP Elav-like family member 1                     | 10  | 43 | 2  | 0.5 |
| H0YAZ9    | Cyclin-dependent kinase 16                          | 17  | 6  | 1  | 0.5 |
| P42773    | Cyclin-dependent kinase 4 inhibitor C               | 25  | 26 | 3  | 0.7 |
| Q00534    | Cyclin-dependent kinase 6                           | 74  | 40 | 9  | 0.7 |
| E9PND2    | Cysteine and glycine-rich protein 1                 | 14  | 37 | 3  | 0.5 |
| Q9Y4P1-6  | Cysteine protease ATG4B                             | 25  | 23 | 7  | 0.7 |
| B7Z382    | Cytosolic purine 5'-nucleotidase                    | 19  | 17 | 6  | 0.6 |
| O43175    | D-3-phosphoglycerate dehydrogenase                  | 272 | 52 | 27 | 0.5 |
| C9JAB0    | DCC-interacting protein 13-alpha                    | 9   | 25 | 2  | 0.6 |
| Q9NR28-2  | Diablo homolog, mitochondrial                       | 27  | 49 | 7  | 0.6 |
| O76075-2  | DNA fragmentation factor subunit beta               | 14  | 7  | 1  | 0.7 |
| P49917    | DNA ligase 4                                        | 9   | 5  | 2  | 0.7 |
| P28340    | DNA polymerase delta catalytic subunit              | 32  | 8  | 8  | 0.7 |
| P11388    | DNA topoisomerase 2-alpha                           | 15  | 3  | 1  | 0.6 |
| O14593    | DNA-binding protein RFXANK                          | 11  | 20 | 2  | 0.5 |
| Q8WXX5    | DnaJ homolog subfamily C member 9                   | 17  | 12 | 3  | 0.7 |
| Q14203-3  | Dynactin subunit 1                                  | 113 | 23 | 22 | 0.7 |
| F5H223    | Dynactin subunit 2                                  | 26  | 27 | 8  | 0.6 |
| O60313    | Dynamin-like 120 kDa protein, mitochondrial         | 56  | 13 | 12 | 0.6 |
| Q5VTU3    | Dynein light chain Tctex-type 1                     | 42  | 37 | 2  | 0.7 |
| Q9Y4X5    | E3 ubiquitin-protein ligase ARIH1                   | 19  | 14 | 5  | 0.6 |
| Q5T4S7-3  | E3 ubiquitin-protein ligase UBR4                    | 73  | 4  | 15 | 0.6 |
| Q9HC35    | Echinoderm microtubule-associated protein-like 4    | 10  | 5  | 4  | 0.6 |
| Q14657    | EKC/KEOPS complex subunit LAGE3                     | 26  | 31 | 3  | 0.7 |

|          |                                                              |     |    |    |     |
|----------|--------------------------------------------------------------|-----|----|----|-----|
| P29692-3 | Elongation factor 1-delta                                    | 202 | 54 | 1  | 0.4 |
| P49411   | Elongation factor Tu, mitochondrial                          | 208 | 50 | 21 | 0.5 |
| Q96FZ2   | Embryonic stem cell-specific protein                         | 25  | 20 | 5  | 0.4 |
| Q9BS26   | Endoplasmic reticulum resident protein 44                    | 77  | 35 | 11 | 0.7 |
| P42126   | Enoyl-CoA delta isomerase 1, mitochondrial                   | 53  | 27 | 7  | 0.7 |
| S4R3U1   | Epidermal growth factor receptor substrate 15                | 12  | 46 | 1  | 0.4 |
| Q53GQ0   | Estradiol 17-beta-dehydrogenase 12                           | 80  | 51 | 12 | 0.7 |
| O43324   | Eukaryotic translation elongation factor 1 epsilon-1         | 81  | 64 | 10 | 0.7 |
| O60739   | Eukaryotic translation initiation factor 1b                  | 49  | 62 | 1  | 0.7 |
| Q9Y5B9   | FACT complex subunit SPT16                                   | 54  | 17 | 15 | 0.6 |
| Q08945   | FACT complex subunit SSRP1                                   | 48  | 22 | 14 | 0.5 |
| Q86UX7-2 | Fermitin family homolog 3                                    | 176 | 41 | 19 | 0.6 |
| P02794   | Ferritin heavy chain                                         | 35  | 42 | 6  | 0.2 |
| Q9H488   | GDP-fucose protein O-fucosyltransferase 1                    | 19  | 13 | 3  | 0.6 |
| Q3V6T2-5 | Girdin                                                       | 83  | 12 | 17 | 0.5 |
| M0QYG8   | Glia maturation factor gamma                                 | 12  | 31 | 2  | 0.7 |
| O94925   | Glutaminase kidney isoform, mitochondrial                    | 46  | 20 | 1  | 0.7 |
| P35754   | Glutaredoxin-1                                               | 46  | 71 | 5  | 0.6 |
| Q86SX6   | Glutaredoxin-related protein 5, mitochondrial                | 21  | 21 | 4  | 0.5 |
| P78417   | Glutathione S-transferase omega-1                            | 33  | 39 | 10 | 0.6 |
| P09211   | Glutathione S-transferase P                                  | 500 | 64 | 12 | 0.7 |
| P48637   | Glutathione synthetase                                       | 17  | 14 | 8  | 0.6 |
| P35573-2 | Glycogen debranching enzyme                                  | 24  | 7  | 9  | 0.6 |
| P11216   | Glycogen phosphorylase, brain form                           | 65  | 22 | 15 | 0.7 |
| Q92896   | Golgi apparatus protein 1                                    | 69  | 16 | 14 | 0.3 |
| H7BXD5   | Grancalcin                                                   | 28  | 50 | 8  | 0.6 |
| F8W9S7   | GTPase-activating protein and VPS9 domain-containing protein | 72  | 14 | 14 | 0.7 |
| Q14344   | Guanine nucleotide-binding protein subunit alpha-13          | 88  | 46 | 13 | 0.7 |
| Q9BVP2-2 | Guanine nucleotide-binding protein-like 3                    | 59  | 17 | 8  | 0.6 |
| H7C0M1   | H/ACA ribonucleoprotein complex subunit 4                    | 10  | 24 | 3  | 0.6 |
| O00165-5 | HCLS1-associated protein X-1                                 | 24  | 35 | 5  | 0.6 |
| Q7Z4H3-2 | HD domain-containing protein 2                               | 15  | 35 | 5  | 0.6 |
| P14317   | Hematopoietic lineage cell-specific protein                  | 187 | 44 | 18 | 0.7 |
| Q7LGA3   | Heparan sulfate 2-O-sulfotransferase 1                       | 12  | 5  | 1  | 0.4 |
| O14964-2 | Hepatocyte growth factor-regulated tyrosine kinase substrate | 10  | 4  | 2  | 0.5 |
| P55795   | Heterogeneous nuclear ribonucleoprotein H2                   | 142 | 21 | 1  | 0.6 |
| Q00839   | Heterogeneous nuclear ribonucleoprotein U                    | 328 | 37 | 1  | 0.6 |
| P17096-2 | High mobility group protein HMG-I/HMG-Y                      | 11  | 31 | 1  | 0.7 |
| P17096   | High mobility group protein HMG-I/HMG-Y                      | 23  | 38 | 3  | 0.5 |
| P49773   | Histidine triad nucleotide-binding protein 1                 | 108 | 74 | 6  | 0.7 |
| P16403   | Histone H1.2                                                 | 112 | 33 | 3  | 0.4 |
| P16402   | Histone H1.3                                                 | 104 | 39 | 6  | 0.5 |

|          |                                                             |      |    |    |     |
|----------|-------------------------------------------------------------|------|----|----|-----|
| P10412   | Histone H1.4                                                | 114  | 37 | 3  | 0.5 |
| P16401   | Histone H1.5                                                | 88   | 31 | 10 | 0.4 |
| Q92522   | Histone H1x                                                 | 34   | 33 | 7  | 0.5 |
| P04908   | Histone H2A type 1-B/E                                      | 157  | 41 | 1  | 0.2 |
| Q6FI13   | Histone H2A type 2-A                                        | 188  | 63 | 2  | 0.4 |
| Q8IUE6   | Histone H2A type 2-B                                        | 76   | 42 | 4  | 0.5 |
| P0C0S5   | Histone H2A.Z                                               | 92   | 54 | 4  | 0.5 |
| O60814   | Histone H2B type 1-K                                        | 157  | 56 | 4  | 0.3 |
| Q8N257   | Histone H2B type 3-B                                        | 149  | 50 | 3  | 0.4 |
| K7EK07   | Histone H3                                                  | 52   | 45 | 1  | 0.3 |
| P68431   | Histone H3.1                                                | 61   | 51 | 1  | 0.3 |
| Q71DI3   | Histone H3.2                                                | 72   | 51 | 1  | 0.3 |
| P62805   | Histone H4                                                  | 201  | 54 | 10 | 0.4 |
| Q6YN16   | Hydroxysteroid dehydrogenase-like protein 2                 | 15   | 15 | 4  | 0.6 |
| D6RD17   | Immunoglobulin J chain                                      | 10   | 28 | 4  | 0.6 |
| Q969P0-3 | Immunoglobulin superfamily member 8                         | 22   | 14 | 5  | 0.6 |
| O15111   | Inhibitor of nuclear factor kappa-B kinase subunit alpha    | 14   | 2  | 1  | 0.4 |
| Q9NZI8   | Insulin-like growth factor 2 mRNA-binding protein 1         | 175  | 42 | 19 | 0.6 |
| Q27J81-2 | Inverted formin-2                                           | 15   | 2  | 2  | 0.5 |
| P50213   | Isocitrate dehydrogenase [NAD] subunit alpha, mitochondrial | 65   | 36 | 11 | 0.5 |
| O43837   | Isocitrate dehydrogenase [NAD] subunit beta, mitochondrial  | 38   | 23 | 8  | 0.4 |
| E9PF84   | Isocitrate dehydrogenase [NAD] subunit gamma, mitochondrial | 11   | 22 | 4  | 0.3 |
| Q96BW5-2 | Isoform 2 of Phosphotriesterase-related protein             | 54   | 44 | 11 | 0.5 |
| Q9NY93-2 | Isoform 2 of Probable ATP-dependent RNA helicase DDX56      | 21   | 14 | 5  | 0.6 |
| Q9GZT8-2 | Isoform 2 of Putative GTP cyclohydrolase 1 type 2 NIF3L1    | 11   | 10 | 3  | 0.6 |
| Q4G0N4-3 | Isoform 3 of NAD kinase 2, mitochondrial                    | 31   | 35 | 7  | 0.4 |
| Q8N983-4 | Isoform 4 of 39S ribosomal protein L43, mitochondrial       | 23   | 37 | 6  | 0.4 |
| P14618-2 | Isoform M1 of Pyruvate kinase PKM                           | 1141 | 69 | 4  | 0.7 |
| P60660-2 | Isoform Smooth muscle of Myosin light polypeptide 6         | 89   | 76 | 8  | 0.6 |
| O00139-2 | Kinesin-like protein KIF2A                                  | 35   | 12 | 8  | 0.6 |
| Q01650   | Large neutral amino acids transporter small subunit 1       | 15   | 9  | 3  | 0.7 |
| Q9UIQ6-3 | Leucyl-cystinylaminopeptidase                               | 120  | 25 | 26 | 0.6 |
| Q08722-2 | Leukocyte surface antigen CD47                              | 9    | 10 | 3  | 0.5 |
| P19397   | Leukocyte surface antigen CD53                              | 14   | 7  | 2  | 0.3 |
| C9JUK7   | Leukosialin                                                 | 16   | 8  | 3  | 0.4 |
| Q14847   | LIM and SH3 domain protein 1                                | 40   | 48 | 11 | 0.7 |
| F8VRN8   | LIM domain and actin-binding protein 1                      | 10   | 3  | 1  | 0.5 |
| J3QQM5   | LIM domain-containing protein 2                             | 10   | 27 | 3  | 0.6 |
| Q9GZY6   | Linker for activation of T-cells family member 2            | 10   | 16 | 2  | 0.5 |
| O95573   | Long-chain-fatty-acid--CoA ligase 3                         | 14   | 8  | 2  | 0.7 |
| Q12912-2 | Lymphoid-restricted membrane protein                        | 144  | 48 | 24 | 0.6 |

|          |                                                            |      |    |    |     |
|----------|------------------------------------------------------------|------|----|----|-----|
| H7C413   | Lys-63-specific deubiquitinase BRCC36                      | 9    | 35 | 1  | 0.7 |
| P10619   | Lysosomal protective protein                               | 11   | 5  | 2  | 0.3 |
| Q8WU39   | Marginal zone B- and B1-cell-specific protein              | 60   | 39 | 5  | 0.7 |
| Q9NZD8-2 | Maspardin                                                  | 14   | 14 | 4  | 0.6 |
| B7Z9I1   | Medium-chain-specific acyl-CoA dehydrogenase               | 102  | 40 | 13 | 0.6 |
| P53582   | Methionine aminopeptidase 1                                | 52   | 29 | 8  | 0.5 |
| O14880   | Microsomal glutathione S-transferase 3                     | 22   | 18 | 3  | 0.6 |
| Q7Z434   | Mitochondrial antiviral-signaling protein                  | 30   | 9  | 3  | 0.7 |
| O43615   | Mitochondrial import inner membrane translocase            | 122  | 38 | 19 | 0.7 |
| Q7L0Y3   | Mitochondrial ribonuclease P protein 1                     | 30   | 25 | 9  | 0.6 |
| P27361   | Mitogen-activated protein kinase 3                         | 32   | 26 | 5  | 0.7 |
| Q9BU76-4 | Multiple myeloma tumor-associated protein 2                | 10   | 19 | 3  | 0.7 |
| Q9NUJ1   | Mycophenolic acid acyl-glucuronide esterase, mitochondrial | 75   | 45 | 10 | 0.6 |
| P19105   | Myosin regulatory light chain 12A                          | 58   | 57 | 7  | 0.6 |
| P13533   | Myosin-6                                                   | 9    | 1  | 1  | 0.1 |
| P35579   | Myosin-9                                                   | 1293 | 57 | 99 | 0.6 |
| Q86U44   | N6-adenosine-methyltransferase 70 kDa subunit              | 19   | 15 | 7  | 0.6 |
| P56556   | NADH dehydrogenase [ubiquinone] 1 alpha subcomplex         | 24   | 29 | 4  | 0.4 |
| O95299   | NADH dehydrogenase [ubiquinone] 1 alpha subcomplex         | 37   | 26 | 4  | 0.3 |
| Q9UI09   | NADH dehydrogenase [ubiquinone] 1 alpha subcomplex         | 10   | 23 | 3  | 0.4 |
| Q16795   | NADH dehydrogenase [ubiquinone] 1 alpha subcomplex         | 50   | 31 | 8  | 0.7 |
| P17568   | NADH dehydrogenase [ubiquinone] 1 beta subcomplex          | 10   | 14 | 2  | 0.7 |
| P49821-2 | NADH dehydrogenase [ubiquinone] flavoprotein 1             | 30   | 20 | 8  | 0.5 |
| P19404   | NADH dehydrogenase [ubiquinone] flavoprotein 2             | 16   | 21 | 4  | 0.4 |
| P56181-2 | NADH dehydrogenase [ubiquinone] flavoprotein 3             | 11   | 7  | 3  | 0.5 |
| O75489   | NADH dehydrogenase [ubiquinone] iron-sulfur protein 3      | 106  | 52 | 14 | 0.7 |
| O43920   | NADH dehydrogenase [ubiquinone] iron-sulfur protein 5      | 26   | 51 | 5  | 0.7 |
| O00217   | NADH dehydrogenase [ubiquinone] iron-sulfur protein 8      | 17   | 34 | 5  | 0.6 |
| P28331-4 | NADH-ubiquinone oxidoreductase                             | 95   | 32 | 14 | 0.4 |
| B4DR03   | N-alpha-acetyltransferase 40                               | 10   | 13 | 2  | 0.6 |
| Q9Y5A7-2 | NEDD8 ultimate buster 1                                    | 29   | 16 | 7  | 0.6 |
| Q13564-2 | NEDD8-activating enzyme E1 regulatory subunit              | 22   | 18 | 6  | 0.6 |
| P08473   | Neprilysin                                                 | 48   | 24 | 15 | 0.6 |
| Q15758   | Neutral amino acid transporter B(0)                        | 82   | 22 | 9  | 0.7 |
| P05114   | Non-histone chromosomal protein HMG-14                     | 10   | 31 | 3  | 0.5 |
| P61970   | Nuclear transport factor 2                                 | 17   | 57 | 4  | 0.6 |
| O00567   | Nucleolar protein 56                                       | 97   | 39 | 20 | 0.5 |
| Q9Y2X3   | Nucleolar protein 58                                       | 93   | 33 | 16 | 0.6 |
| Q9H6R4-4 | Nucleolar protein 6                                        | 45   | 11 | 8  | 0.5 |
| Q9UMY1   | Nucleolar protein 7                                        | 10   | 13 | 2  | 0.7 |
| P15531   | Nucleoside diphosphate kinase A                            | 187  | 86 | 2  | 0.5 |
| Q9BQ69   | O-acetyl-ADP-ribose deacetylase MACROD1                    | 34   | 18 | 4  | 0.4 |
| Q92882   | Osteoclast-stimulating factor 1                            | 27   | 34 | 6  | 0.7 |

|          |                                                                 |     |    |    |     |
|----------|-----------------------------------------------------------------|-----|----|----|-----|
| P50897   | Palmitoyl-protein thioesterase 1                                | 17  | 25 | 4  | 0.4 |
| Q96EY7   | Pentatricopeptide repeat domain-containing protein              | 18  | 11 | 4  | 0.2 |
| Q00688   | Peptidyl-prolylcis-trans isomerase FKBP3                        | 56  | 38 | 9  | 0.7 |
| J3KS15   | Peptidyl-tRNA hydrolase ICT1, mitochondrial                     | 14  | 23 | 4  | 0.3 |
| Q13162   | Peroxiredoxin-4                                                 | 180 | 65 | 13 | 0.7 |
| Q8WW12   | PEST proteolytic signal-containing nuclear protein              | 40  | 48 | 8  | 0.7 |
| O15357   | Phosphatidylinositol 3,4,5-trisphosphate 5-phosphatase 2        | 29  | 7  | 7  | 0.7 |
| Q16822   | Phosphoenolpyruvatecarboxykinase [GTP], mitochondrial           | 55  | 22 | 12 | 0.6 |
| Q9NWQ8   | Phosphoprotein associated with glycosphingolipid-enriched       | 11  | 8  | 2  | 0.3 |
| Q14558   | Phosphoribosyl pyrophosphate synthase-associated protein 1      | 85  | 44 | 9  | 0.7 |
| Q9Y617   | Phosphoserine aminotransferase                                  | 299 | 68 | 18 | 0.4 |
| C9JBI3   | Phosphoserine phosphatase                                       | 83  | 63 | 9  | 0.4 |
| Q6NYC8   | Phostensin O                                                    | 25  | 12 | 5  | 0.6 |
| O15031   | Plexin-B2                                                       | 34  | 7  | 9  | 0.7 |
| P09874   | Poly [ADP-ribose] polymerase 1                                  | 382 | 43 | 44 | 0.4 |
| Q9BY77   | Polymerase delta-interacting protein 3                          | 28  | 20 | 6  | 0.7 |
| P14859-4 | POU domain, class 2, transcription factor 1                     | 18  | 5  | 2  | 0.5 |
| Q8IY81   | pre-rRNA processing protein FTSJ3                               | 50  | 17 | 10 | 0.6 |
| Q92841   | Probable ATP-dependent RNA helicase DDX17                       | 185 | 42 | 22 | 0.6 |
| Q96GQ7   | Probable ATP-dependent RNA helicase DDX27                       | 23  | 10 | 7  | 0.7 |
| Q8NBJ5   | Procollagengalactosyltransferase 1                              | 13  | 6  | 4  | 0.4 |
| Q9BUL8   | Programmed cell death protein 10                                | 38  | 31 | 7  | 0.7 |
| Q16186   | Proteasomal ubiquitin receptor ADRM1                            | 14  | 11 | 3  | 0.5 |
| P28074   | Proteasome subunit beta type-5                                  | 98  | 41 | 12 | 0.6 |
| K7EK88   | Protein AATF                                                    | 10  | 26 | 2  | 0.4 |
| Q13015   | Protein AF1q                                                    | 10  | 48 | 3  | 0.4 |
| O75629   | Protein CREG1                                                   | 44  | 18 | 3  | 0.4 |
| P35659   | Protein DEK                                                     | 58  | 27 | 12 | 0.7 |
| C9J6N5   | Protein FAM107B                                                 | 41  | 37 | 6  | 0.6 |
| Q96C01   | Protein FAM136A                                                 | 10  | 20 | 2  | 0.3 |
| Q92520   | Protein FAM3C                                                   | 33  | 36 | 8  | 0.6 |
| E9PH82   | Protein FAM98A                                                  | 24  | 13 | 2  | 0.7 |
| Q9UNF0-2 | Protein kinase C and casein kinase substrate in neurons protein | 26  | 17 | 7  | 0.5 |
| G3V5L1   | Protein max                                                     | 10  | 25 | 2  | 0.5 |
| Q9UFN0   | Protein NipSnap homolog 3A                                      | 62  | 44 | 8  | 0.6 |
| Q8NBL1   | Protein O-glucosyltransferase 1                                 | 10  | 8  | 3  | 0.5 |
| Q15435   | Protein phosphatase 1 regulatory subunit 7                      | 62  | 37 | 10 | 0.7 |
| Q14690   | Protein RRP5 homolog                                            | 35  | 6  | 9  | 0.6 |
| P31949   | Protein S100-A11                                                | 18  | 50 | 5  | 0.6 |
| A6NIH7   | Protein unc-119 homolog B                                       | 17  | 22 | 4  | 0.6 |
| P22061   | Protein-L-isoaspartate(D-aspartate) O-methyltransferase         | 84  | 62 | 10 | 0.6 |
| Q16740   | Putative ATP-dependent Clp protease proteolytic subunit         | 39  | 30 | 6  | 0.7 |

|          |                                                             |     |    |    |     |
|----------|-------------------------------------------------------------|-----|----|----|-----|
| P32322   | Pyrroline-5-carboxylate reductase 1, mitochondrial          | 40  | 30 | 5  | 0.4 |
| Q96C36   | Pyrroline-5-carboxylate reductase 2                         | 18  | 21 | 3  | 0.5 |
| P08559   | Pyruvate dehydrogenase E1 component subunit alpha           | 24  | 18 | 6  | 0.7 |
| P31150   | Rab GDP dissociation inhibitor alpha                        | 177 | 23 | 1  | 0.6 |
| P52306   | Rap1 GTPase-GDP dissociation stimulator 1                   | 48  | 33 | 14 | 0.7 |
| Q8WUD1   | Ras-related protein Rab-2B                                  | 52  | 36 | 2  | 0.7 |
| F5H157   | Ras-related protein Rab-35                                  | 45  | 27 | 2  | 0.6 |
| P51151   | Ras-related protein Rab-9A                                  | 9   | 19 | 3  | 0.7 |
| P11234   | Ras-related protein Ral-B                                   | 30  | 43 | 3  | 0.6 |
| P61225   | Ras-related protein Rap-2b                                  | 21  | 13 | 1  | 0.6 |
| Q9Y3L5   | Ras-related protein Rap-2c                                  | 16  | 17 | 1  | 0.5 |
| P08575-2 | Receptor-type tyrosine-protein phosphatase C                | 118 | 24 | 22 | 0.7 |
| P35251-2 | Replication factor C subunit 1                              | 22  | 6  | 5  | 0.6 |
| O95197-3 | Reticulon-3                                                 | 29  | 9  | 2  | 0.5 |
| Q15291-2 | Retinoblastoma-binding protein 5                            | 14  | 4  | 2  | 0.6 |
| Q9HB40   | Retinoid-inducible serine carboxypeptidase                  | 23  | 12 | 5  | 0.4 |
| P49247   | Ribose-5-phosphate isomerase                                | 106 | 54 | 15 | 0.5 |
| Q15050   | Ribosome biogenesis regulatory protein homolog              | 31  | 30 | 9  | 0.5 |
| Q9Y3A5   | Ribosome maturation protein SBDS                            | 76  | 52 | 14 | 0.7 |
| Q9H7B2   | Ribosome production factor 2 homolog                        | 42  | 26 | 7  | 0.5 |
| O00442   | RNA 3'-terminal phosphate cyclase                           | 27  | 19 | 6  | 0.7 |
| Q92541   | RNA polymerase-associated protein RTF1 homolog              | 10  | 6  | 4  | 0.3 |
| Q9NW13   | RNA-binding protein 28                                      | 60  | 14 | 8  | 0.6 |
| Q96DH6-2 | RNA-binding protein Musashi homolog 2                       | 28  | 26 | 5  | 0.7 |
| Q96T51-2 | RUN and FYVE domain-containing protein 1                    | 13  | 6  | 3  | 0.6 |
| O15126   | Secretory carrier-associated membrane protein 1             | 27  | 14 | 3  | 0.6 |
| D6RGI3   | Septin 11, isoform CRA_b                                    | 69  | 43 | 8  | 0.6 |
| B4DR80   | Serine/threonine-protein kinase 24 12 kDa subunit           | 34  | 24 | 4  | 0.7 |
| Q8NBY1   | Serine/threonine-protein kinase MST4                        | 40  | 39 | 7  | 0.7 |
| H0YDU8   | Serine/threonine-protein phosphatase                        | 44  | 20 | 10 | 0.7 |
| Q08209-3 | Serine/threonine-protein phosphatase 2B catalytic           | 20  | 14 | 6  | 0.7 |
| Q8TF05-2 | Serine/threonine-protein phosphatase 4 regulatory subunit 1 | 19  | 4  | 3  | 0.6 |
| P49591   | Serine--tRNA ligase, cytoplasmic                            | 105 | 43 | 18 | 0.7 |
| P50453   | Serpin B9                                                   | 22  | 15 | 5  | 0.5 |
| P10768   | S-formylglutathione hydrolase                               | 154 | 76 | 15 | 0.7 |
| H0YNG3   | Signal peptidase complex catalytic subunit SEC11A           | 20  | 21 | 5  | 0.7 |
| P05023   | Sodium/potassium-transporting ATPase subunit alpha-1        | 182 | 35 | 19 | 0.6 |
| G3XAL9   | Sodium/potassium/chloride transporter                       | 11  | 2  | 1  | 0.7 |
| Q96L92-2 | Sorting nexin-27                                            | 12  | 6  | 3  | 0.6 |
| P52788   | Spermine synthase                                           | 60  | 45 | 11 | 0.6 |
| P31948   | Stress-induced-phosphoprotein 1                             | 277 | 49 | 34 | 0.7 |
| Q99470   | Stromal cell-derived factor 2                               | 32  | 23 | 3  | 0.6 |
| Q8WU79-2 | Stromal membrane-associated protein 2                       | 11  | 8  | 3  | 0.5 |



|          |                                                             |     |    |    |     |
|----------|-------------------------------------------------------------|-----|----|----|-----|
| Q6ZRP7   | Sulfhydryl oxidase 2                                        | 28  | 12 | 6  | 0.4 |
| P00441   | Superoxide dismutase [Cu-Zn]                                | 246 | 86 | 10 | 0.7 |
| P04179-4 | Superoxide dismutase [Mn], mitochondrial                    | 96  | 60 | 9  | 0.7 |
| Q9UH65   | Switch-associated protein 70                                | 145 | 46 | 23 | 0.7 |
| Q96A49   | Synapse-associated protein 1                                | 25  | 21 | 4  | 0.6 |
| O00186   | Syntaxin-binding protein 3                                  | 24  | 13 | 6  | 0.7 |
| E7EPD0   | Target of Myb protein 1                                     | 10  | 8  | 3  | 0.6 |
| P51580   | Thiopurine S-methyltransferase                              | 9   | 12 | 3  | 0.6 |
| H7BZJ3   | Thioredoxin                                                 | 67  | 58 | 1  | 0.7 |
| B7Z2S5   | Thioredoxinreductase 1, cytoplasmic                         | 110 | 47 | 20 | 0.7 |
| Q96CG3   | TRAF-interacting protein with FHA domain-containing protein | 23  | 43 | 7  | 0.6 |
| Q14241   | Transcription elongation factor B polypeptide 3             | 9   | 4  | 2  | 0.6 |
| Q00059   | Transcription factor A, mitochondrial                       | 22  | 29 | 8  | 0.4 |
| Q9UI10-3 | Translation initiation factor eIF-2B subunit delta          | 26  | 19 | 6  | 0.6 |
| P40939   | Trifunctional enzyme subunit alpha, mitochondrial           | 137 | 39 | 20 | 0.6 |
| P55084   | Trifunctional enzyme subunit beta, mitochondrial            | 60  | 25 | 11 | 0.5 |
| P23381   | Tryptophan--tRNA ligase, cytoplasmic                        | 253 | 67 | 25 | 0.6 |
| Q9Y3Q8   | TSC22 domain family protein 4                               | 12  | 21 | 4  | 0.6 |
| Q13509   | Tubulin beta-3 chain                                        | 450 | 65 | 6  | 0.7 |
| Q9UBB9   | Tuftelin-interacting protein 11                             | 9   | 5  | 3  | 0.6 |
| O43399   | Tumor protein D54                                           | 71  | 51 | 2  | 0.7 |
| Q9UIG0-2 | Tyrosine-protein kinase BAZ1B                               | 26  | 6  | 7  | 0.6 |
| P06241   | Tyrosine-protein kinase Fyn                                 | 19  | 4  | 1  | 0.7 |
| P43405   | Tyrosine-protein kinase SYK                                 | 16  | 15 | 5  | 0.7 |
| P54577   | Tyrosine--tRNA ligase, cytoplasmic                          | 196 | 63 | 34 | 0.6 |
| Q9BVJ6   | U3 small nucleolar RNA-associated protein 14 homolog A      | 17  | 9  | 5  | 0.6 |
| Q9Y5J1   | U3 small nucleolar RNA-associated protein 18 homolog        | 11  | 12 | 4  | 0.7 |
| O15116   | U6 snRNA-associated Sm-like protein LSml                    | 23  | 42 | 4  | 0.7 |
| Q9NRR5   | Ubiquilin-4                                                 | 42  | 14 | 3  | 0.6 |
| P09936   | Ubiquitin carboxyl-terminal hydrolase isozyme L1            | 283 | 83 | 15 | 0.7 |
| A6NJ11   | Ubiquitin fusion degradation protein 1 homolog              | 17  | 23 | 4  | 0.6 |
| P51668   | Ubiquitin-conjugating enzyme E2 D1                          | 32  | 24 | 2  | 0.6 |
| Q5QPP3   | UDP-glucose 4-epimerase                                     | 10  | 12 | 2  | 0.5 |
| F8W031   | Uncharacterized protein                                     | 51  | 30 | 6  | 0.7 |
| Q9BUH6   | Uncharacterized protein C9orf142                            | 14  | 23 | 3  | 0.6 |
| Q8IYS2   | Uncharacterized protein KIAA2013                            | 23  | 11 | 5  | 0.6 |
| Q16851   | UTP--glucose-1-phosphate uridylyltransferase                | 51  | 28 | 13 | 0.7 |
| P49748   | Very long-chain specific acyl-CoA dehydrogenase,            | 73  | 28 | 14 | 0.6 |
| Q8WV19   | Vesicle transport protein SFT2A                             | 13  | 17 | 1  | 0.3 |
| Q5TIH2   | Vesicle transport protein SFT2B                             | 13  | 25 | 2  | 0.7 |
| Q587I9   | Vesicle transport protein SFT2C                             | 15  | 20 | 3  | 0.4 |
| O75379-2 | Vesicle-associated membrane protein 4                       | 10  | 24 | 3  | 0.5 |

|          |                                                  |     |    |    |     |
|----------|--------------------------------------------------|-----|----|----|-----|
| Q13303-4 | Voltage-gated potassium channel subunit beta-2   | 40  | 26 | 8  | 0.6 |
| O75083   | WD repeat-containing protein 1                   | 132 | 42 | 17 | 0.6 |
| Q15061   | WD repeat-containing protein 43                  | 14  | 5  | 3  | 0.6 |
| Q5SZK5   | Wiskott-Aldrich syndrome protein family member 1 | 13  | 18 | 1  | 0.2 |
| F8W840   | YTH domain-containing family protein 1           | 28  | 12 | 2  | 0.5 |
| R4GN55   | YTH domain-containing family protein 3           | 33  | 15 | 3  | 0.4 |
| Q7Z2W4   | Zinc finger CCCH-type antiviral protein 1        | 24  | 8  | 5  | 0.4 |
