# Supplementary material for: Proteomic Analysis of Gossypol Induces Necrosis in Multiple Myeloma Cells
Source: Biomed Res Int. 2014 Aug 14;2014:839232. doi: 10.1155/2014/839232 (PMC4150408; doi:10.1155/2014/839232)
Supplement: Supplementary file 1 — Supplementary Figure 1. Gossypol induced the fold of changes in DNA damage repair and replication associated proteins from the untreated and 40 μM gossypol-treated U266 cells for 24 h as determined by quantitative proteomics. Supplementary Figure 2. Gossypol induced the fold of changes in mitochondrial 28S associated proteins from the untreated and 40 μM gossypol-treated U266 cells for 24 h as determined by quantitative proteomics. Supplementary Figures 3. Gossypol induced the fold of changes in mitochondrial 39S associated proteins from the untreated and 40 μM gossypol-treated U266 cells for 24 h as determined by quantitative proteomics. Supplementary Figure 4. The MS/MS spectra of peptides for identification of selected proteins. Supplementary Table 1. Up-regulated proteins in gossypol-treated cells. Supplementary Table 2. Down-regulated proteins in gossypol-treated cells. [file 839232.f1.zip]

Archive with 4 entries (4 files):
- Supplementary description.docx
- Supplementary Figures(RHX).pdf
- Supplementary Table 2(RHX).pdf
- Supplementary Table1(RHX).pdf
